# Supplementary material
Source: Research Square preprint supplement (doi:10.21203/rs.3.rs-9014566/v1)
Supplement: Supplementary file 1 [file 62676cb06be7d692d5ebbf94.docx]

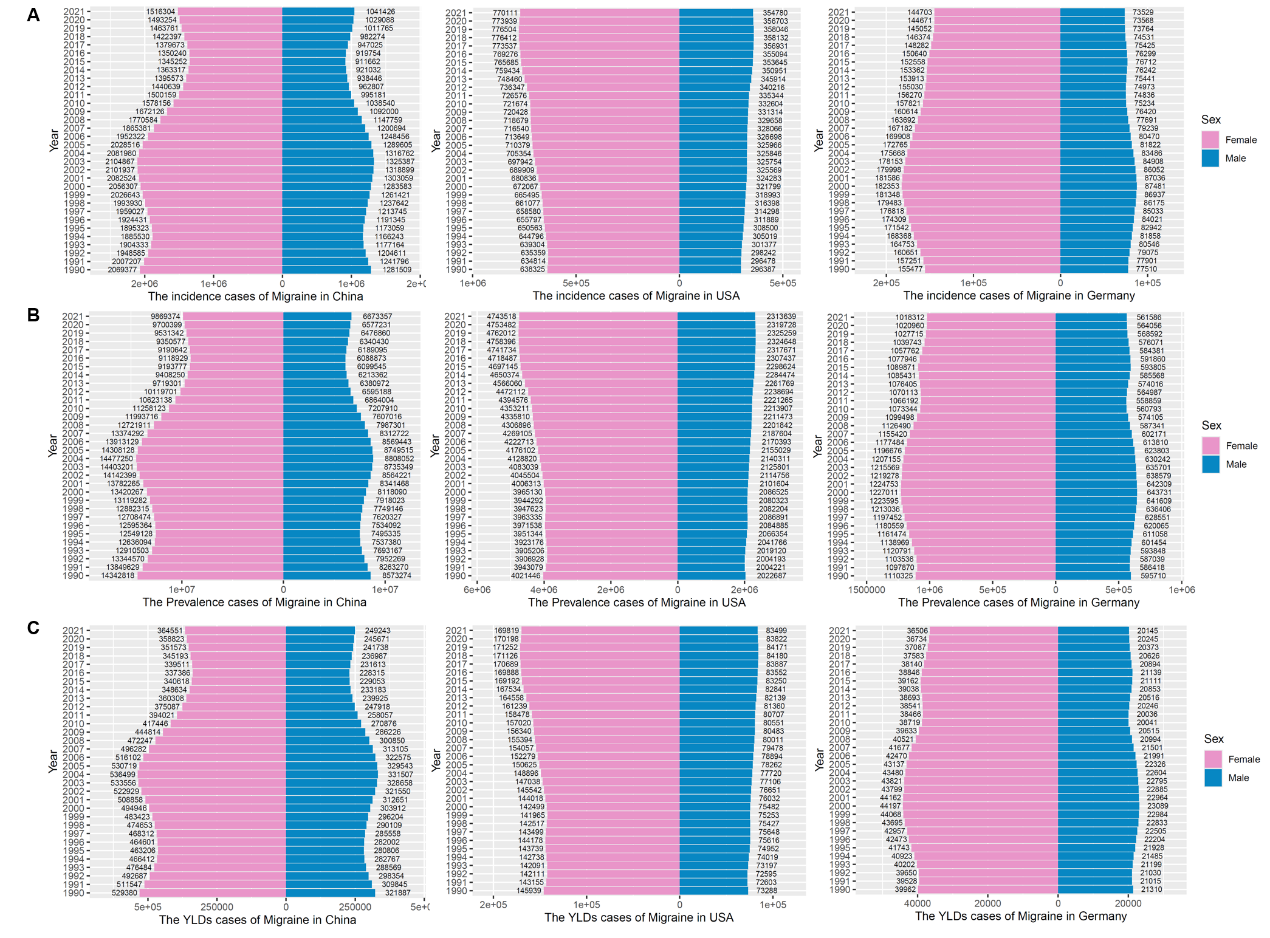


**Figure S1. The temporal cases of migraine in China, the USA, Germany from 1990 to 2021 stratified by genders. A-C.** The different metric cases for migraine from 1990 to 2021 in China, the USA and Germany. Different colors represent female and male.


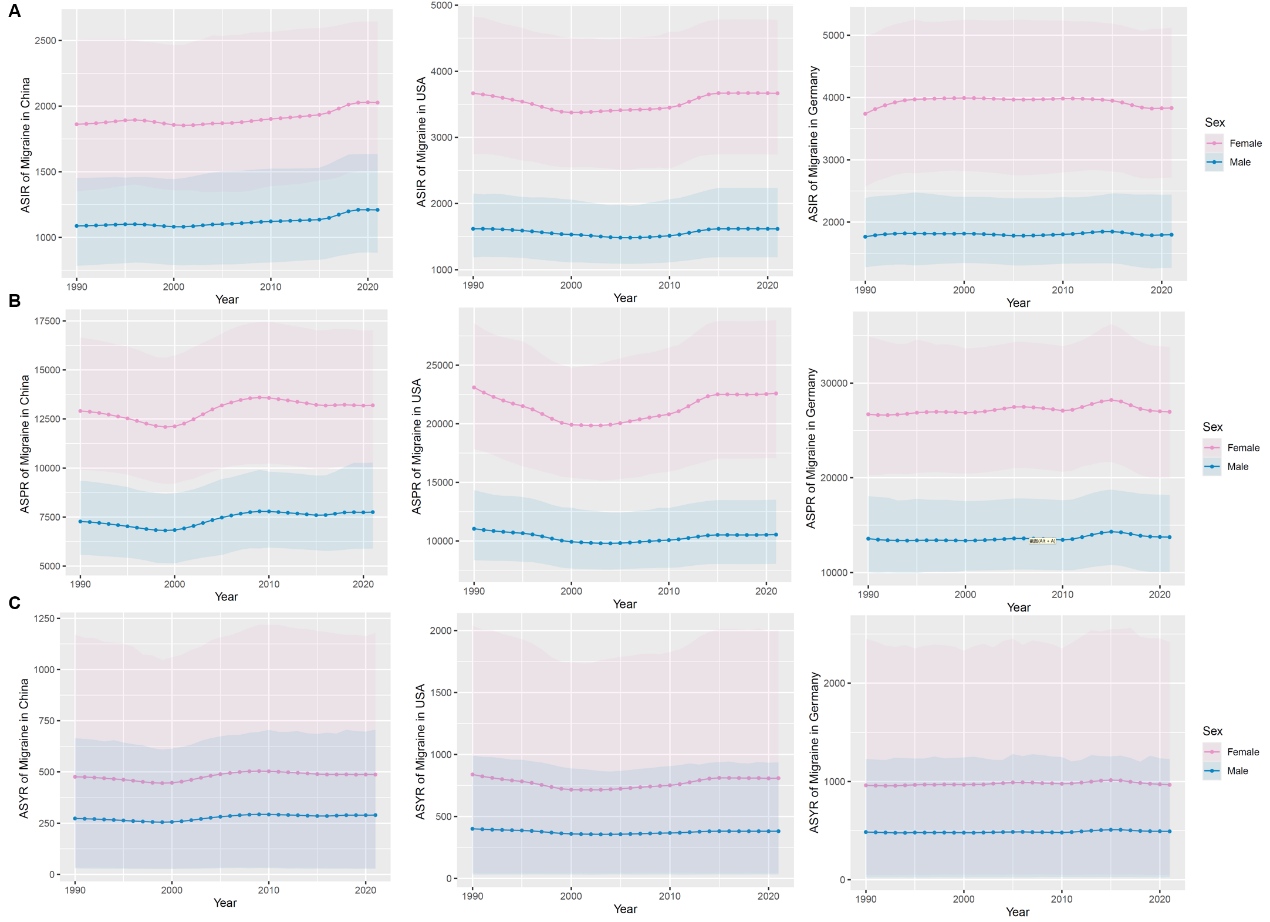


**Figure S2. The temporal ASRs of migraine in China, the USA, Germany from 1990 to 2021 stratified by genders. A-C.** The different metric ASRs for migraine from 1990 to 2021 in China, the USA and Germany. Different colors represent female and male.


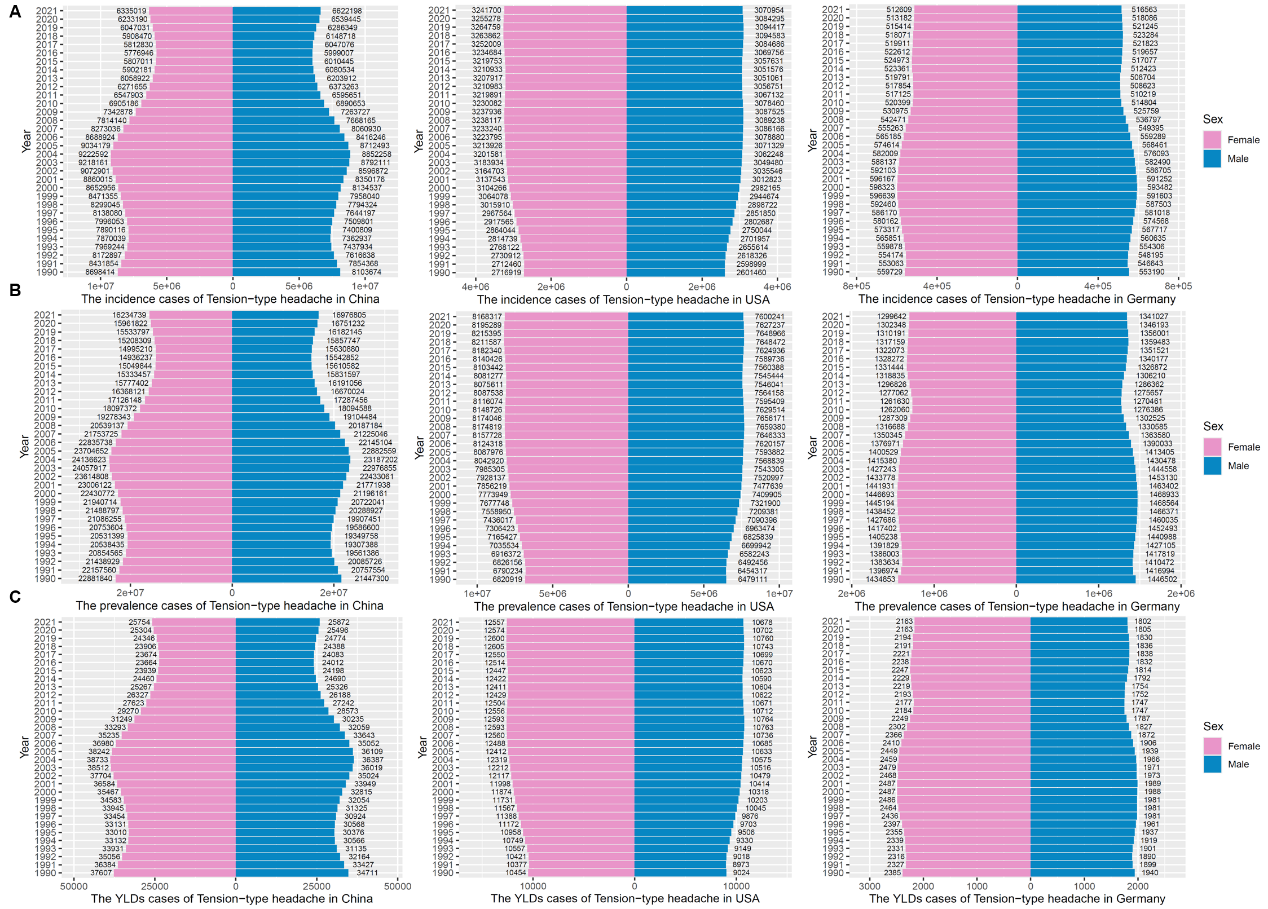


**Figure S3. The temporal cases of TTH in China, the USA, Germany from 1990 to 2021 stratified by genders. A-C.** The different metric cases for TTH from 1990 to 2021 in China, the USA and Germany. Different colors represent female and male.


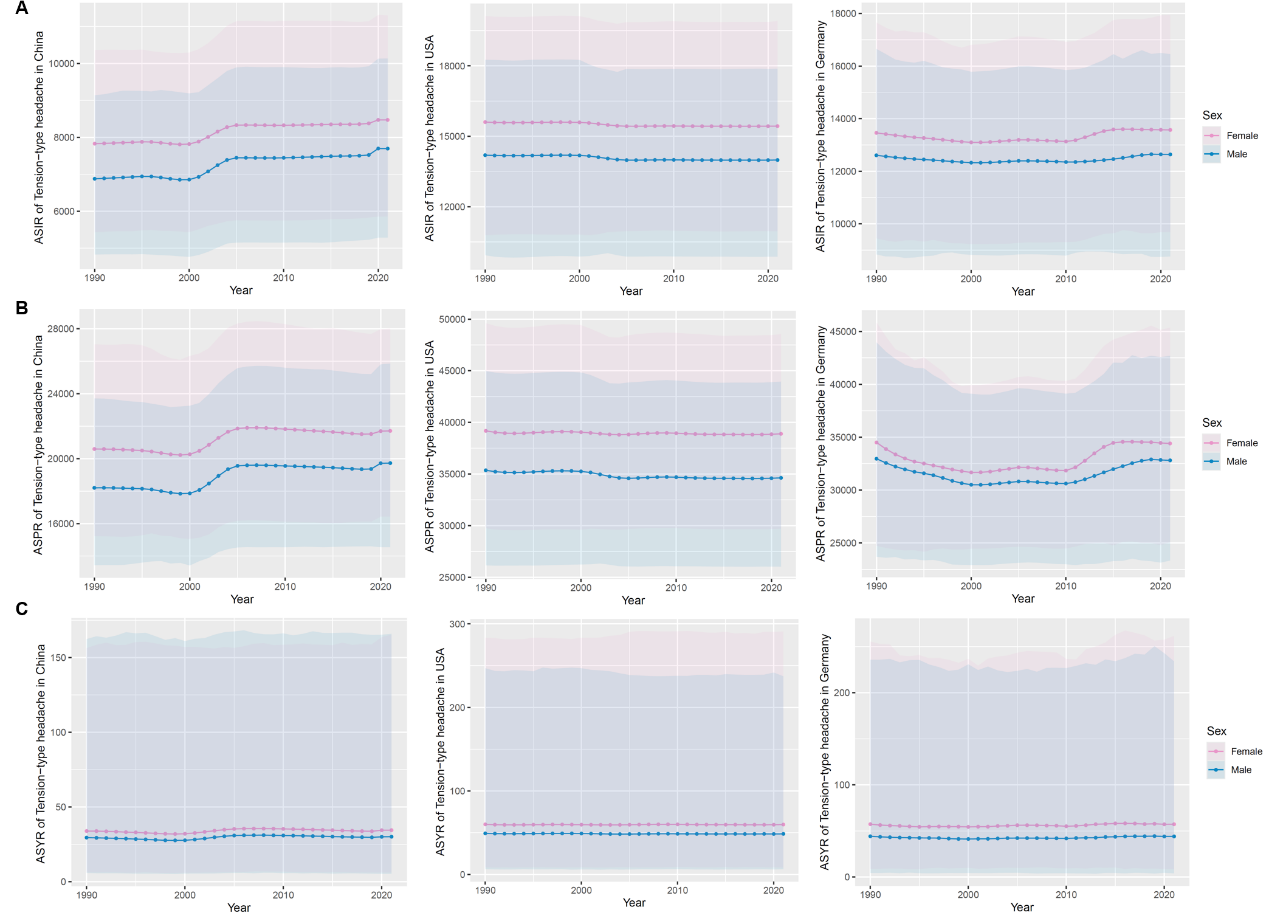


**Figure S4. The temporal ASRs of TTH in China, the USA, Germany from 1990 to 2021 stratified by genders. A-C.** The different metric ASRs for TTH from 1990 to 2021 in China, the USA and Germany. Different colors represent female and male.

**Table S1. The APC and AAPC of prevalence for migraine among Global, China, Germany, and USA stratified by age and sex.**

| **Prevalence** | | | | | | | | | | |
| --- | --- | --- | --- | --- | --- | --- | --- | --- | --- | --- |
| **Location** | **Sex** | **Age** | **year** | **APC** | **AAPC** | **Sex** | **Age** | **year** | **APC** | **AAPC** |
| Global | Female | 10-14 years | 1990-1992 | 0.09 (-0.14,0.33) | 0  (-0.03,0.03) | Male | 10-14 years | 1990-1992 | 0.22 (-0.13,0.57) | 0.11  (0.09,0.14) |
| 1992-2000 | -0.16 (-0.19,-0.13) | 1992-2000 | -0.09 (-0.14,-0.04) |
| 2000-2006 | 0.51 (0.46,0.57) | 2000-2009 | 0.54 (0.5,0.57) |
| 2006-2010 | 0.28 (0.17,0.4) | 2009-2021 | -0.09 (-0.11,-0.06) |
| 2010-2015 | -0.34 (-0.41,-0.26) | 15-19 years | 1990-1996 | 0.42 (0.38,0.46) | 0.19  (0.17,0.21) |
| 2015-2021 | -0.23 (-0.26,-0.19) | 1996-2005 | -0.07 (-0.1,-0.05) |
| 15-19 years | 1990-1996 | 0.23 (0.21,0.24) | 0.05  (0.04,0.07) | 2005-2010 | 0.43 (0.36,0.51) |
| 1996-2003 | -0.23 (-0.24,-0.21) | 2010-2019 | 0.24 (0.22,0.27) |
| 2003-2006 | 0.09 (-0.01,0.2) | 2019-2021 | -0.13 (-0.37,0.1) |
| 2006-2011 | 0.34 (0.31,0.38) |  |  |  |  |  |
| 2011-2019 | 0.05 (0.04,0.07) |  |  |  |  |  |
| 2019-2021 | -0.26 (-0.37,-0.15) |  |  |  |  |  |
| China | Female | 10-14 years | 1990-1995 | -0.02 (-0.1,0.06) | 0.2  (0.16,0.24) | Male | 10-14 years | 1990-2001 | -0.03 (-0.04,-0.02) | 0.36  (0.35,0.38) |
| 1995-2001 | -0.22 (-0.3,-0.14) | 2001-2005 | 0.68 (0.63,0.74) |
| 2001-2010 | 0.69 (0.66,0.73) | 2005-2009 | 1.42 (1.37,1.48) |
| 2010-2015 | -0.05 (-0.17,0.06) | 2009-2015 | 0.03 (0.01,0.05) |
| 2015-2019 | 0.42 (0.25,0.6) | 2015-2019 | 0.78 (0.72,0.83) |
| 2019-2021 | -0.05 (-0.4,0.31) | 2019-2021 | -0.06 (-0.16,0.05) |
| 15-19 years | 1990-1995 | 0.02 (-0.04,0.08) | 0.21  (0.18,0.24) | 15-19 years | 1990-1996 | -0.02 (-0.04,0) | 0.32  (0.31,0.34) |
| 1995-2000 | -0.55 (-0.63,-0.46) | 1996-2000 | -0.5 (-0.57,-0.43) |
| 2000-2009 | 0.71 (0.68,0.74) | 2000-2009 | 0.82 (0.8,0.84) |
| 2009-2015 | -0.02 (-0.08,0.04) | 2009-2015 | 0 (-0.04,0.03) |
| 2015-2019 | 0.72 (0.58,0.85) | 2015-2019 | 1.25 (1.18,1.32) |
| 2019-2021 | 0 (-0.27,0.27) | 2019-2021 | -0.07 (-0.22,0.08) |
| Germany | Female | 10-14 years | 1990-1995 | -0.36 (-0.4,-0.31) | 0.03  (0.01,0.05) | Male | 10-14 years | 1990-1996 | -0.41 (-0.45,-0.37) | 0.03  (0.01,0.06) |
| 1995-2010 | -0.02 (-0.03,-0.02) | 1996-2010 | -0.02 (-0.04,-0.01) |
| 2010-2015 | 1.15 (1.09,1.21) | 2010-2015 | 1.32 (1.24,1.4) |
| 2015-2019 | -0.72 (-0.82,-0.62) | 2015-2019 | -0.73 (-0.85,-0.61) |
| 2019-2021 | 0.08 (-0.13,0.28) | 2019-2021 | 0.08 (-0.17,0.33) |
| 15-19 years | 1990-1993 | 0.93 (0.9,0.96) | 0.06  (0.05,0.07) | 15-19 years | 1990-2000 | 0.06 (0.05,0.07) | 0.05  (0.04,0.06) |
| 1993-1996 | 0.32 (0.26,0.38) | 2000-2010 | -0.02 (-0.03,-0.01) |
| 1996-2010 | 0 (-0.01,0) | 2010-2015 | 1.05 (1.02,1.08) |
| 2010-2015 | 0.46 (0.44,0.48) | 2015-2019 | -1.05 (-1.09,-1) |
| 2015-2019 | -1.07 (-1.1,-1.04) | 2019-2021 | 0.09 (0,0.19) |
| 2019-2021 | 0.08 (0.02,0.14) |  |  |  |  |  |
| USA | Female | 10-14 years | 1990-1996 | -1.55 (-1.58,-1.52) | -0.13  (-0.15,-0.11) | Male | 10-14 years | 1990-1995 | -0.62 (-0.7,-0.55) | -0.24  (-0.28,-0.2) |
| 1996-1999 | -2.38 (-2.53,-2.22) | 1995-1999 | -2.14 (-2.3,-1.98) |
| 1999-2005 | -0.23 (-0.27,-0.19) | 1999-2003 | -0.46 (-0.63,-0.29) |
| 2005-2010 | 0.77 (0.71,0.82) | 2003-2010 | 0.29 (0.24,0.35) |
| 2010-2014 | 2.44 (2.36,2.52) | 2010-2014 | 0.97 (0.8,1.14) |
| 2014-2021 | 0.08 (0.06,0.1) | 2014-2021 | 0.03 (-0.02,0.08) |
| 15-19 years | 1990-1995 | -1.07 (-1.1,-1.04) | -0.04  (-0.06,-0.03) | 15-19 years | 1990-1995 | -0.46 (-0.5,-0.41) | -0.1  (-0.12,-0.08) |
| 1995-1999 | -1.69 (-1.75,-1.63) | 1995-1999 | -1.44 (-1.53,-1.34) |
| 1999-2003 | -0.12 (-0.18,-0.06) | 1999-2005 | -0.52 (-0.56,-0.47) |
| 2003-2010 | 0.44 (0.41,0.46) | 2005-2010 | 0.44 (0.37,0.5) |
| 2010-2014 | 1.97 (1.9,2.04) | 2010-2014 | 1.39 (1.29,1.48) |
| 2014-2021 | 0.08 (0.06,0.09) | 2014-2021 | 0.05 (0.03,0.08) |

**Table S2. The APC and AAPC of YLDs for migraine among Global, China, Germany, and USA stratified by age and sex.**

| **YLDs** | | | | | | | | | | |
| --- | --- | --- | --- | --- | --- | --- | --- | --- | --- | --- |
| **Location** | **Sex** | **Age** | **year** | **APC** | **AAPC** | **Sex** | **Age** | **year** | **APC** | **AAPC** |
| Global | Female | 10-14 years | 1990-1993 | 0.05 (-0.14,0.24) | 0  (-0.05,0.05) | Male | 10-14 years | 1990-1992 | 0.24 (-0.12,0.61) | 0.13  (0.1,0.16) |
| 1993-1998 | -0.22 (-0.34,-0.1) | 1992-2000 | -0.07 (-0.12,-0.02) |
| 1998-2001 | 0.12 (-0.26,0.49) | 2000-2009 | 0.55 (0.51,0.59) |
| 2001-2006 | 0.54 (0.42,0.66) | 2009-2021 | -0.08 (-0.1,-0.05) |
| 2006-2010 | 0.24 (0.06,0.43) | 15-19 years | 1990-1996 | 0.43 (0.38,0.47) | 0.19  (0.17,0.22) |
| 2010-2021 | -0.27 (-0.3,-0.25) | 1996-2005 | -0.05 (-0.08,-0.02) |
| 15-19 years | 1990-1996 | 0.25 (0.23,0.27) | 0.06  (0.04,0.07) | 2005-2010 | 0.42 (0.34,0.51) |
| 1996-2002 | -0.21 (-0.23,-0.18) | 2010-2019 | 0.25 (0.22,0.28) |
| 2002-2005 | -0.04 (-0.15,0.07) | 2019-2021 | -0.24 (-0.51,0.04) |
| 2005-2011 | 0.32 (0.3,0.35) |  |  |  |  |  |
| 2011-2019 | 0.06 (0.05,0.08) |  |  |  |  |  |
| 2019-2021 | -0.39 (-0.5,-0.28) |  |  |  |  |  |
| China | Female | 10-14 years | 1990-1995 | -0.01 (-0.08,0.06) | 0.21  (0.17,0.25) | Male | 10-14 years | 1990-2001 | -0.02 (-0.04,0) | 0.37  (0.32,0.41) |
| 1995-2001 | -0.19 (-0.25,-0.12) | 2001-2006 | 0.79 (0.69,0.89) |
| 2001-2009 | 0.75 (0.71,0.79) | 2006-2009 | 1.58 (1.25,1.9) |
| 2009-2016 | 0.05 (0,0.1) | 2009-2015 | 0 (-0.08,0.07) |
| 2016-2019 | 0.44 (0.15,0.74) | 2015-2019 | 0.76 (0.6,0.93) |
| 2019-2021 | 0 (-0.29,0.29) | 2019-2021 | 0 (-0.33,0.33) |
| 15-19 years | 1990-1995 | 0.05 (-0.02,0.11) | 0.22  (0.18,0.25) | 15-19 years | 1990-1996 | 0.03 (-0.02,0.07) | 0.32  (0.29,0.35) |
| 1995-2000 | -0.54 (-0.64,-0.45) | 1996-2000 | -0.45 (-0.57,-0.32) |
| 2000-2009 | 0.74 (0.71,0.77) | 2000-2009 | 0.79 (0.76,0.81) |
| 2009-2015 | -0.02 (-0.09,0.05) | 2009-2015 | 0.02 (-0.04,0.07) |
| 2015-2019 | 0.64 (0.49,0.79) | 2015-2019 | 1.11 (0.98,1.23) |
| 2019-2021 | 0.11 (-0.19,0.42) | 2019-2021 | -0.05 (-0.3,0.2) |
| Germany | Female | 10-14 years | 1990-1996 | -0.32 (-0.42,-0.22) | 0  (-0.04,0.04) | Male | 10-14 years | 1990-1994 | -0.6 (-0.79,-0.41) | 0.02  (-0.03,0.06) |
| 1996-2010 | -0.01 (-0.04,0.02) | 1994-2010 | -0.04 (-0.06,-0.01) |
| 2010-2015 | 1.12 (0.93,1.3) | 2010-2014 | 1.4 (1.1,1.7) |
| 2015-2021 | -0.58 (-0.68,-0.48) | 2014-2021 | -0.29 (-0.37,-0.21) |
| 15-19 years | 1990-1995 | 0.69 (0.57,0.8) | 0.05  (0,0.1) | 15-19 years | 1990-1998 | 0.1 (0.03,0.17) | 0.06  (-0.01,0.14) |
| 1995-2010 | 0.02 (0,0.05) | 1998-2010 | -0.04 (-0.09,0.01) |
| 2010-2015 | 0.38 (0.22,0.54) | 2010-2015 | 1.01 (0.8,1.22) |
| 2015-2019 | -0.92 (-1.17,-0.66) | 2015-2018 | -1 (-1.65,-0.35) |
| 2019-2021 | -0.22 (-0.73,0.3) | 2018-2021 | -0.1 (-0.44,0.23) |
| USA | Female | 10-14 years | 1990-1995 | -1.4 (-1.46,-1.35) | -0.15  (-0.18,-0.13) | Male | 10-14 years | 1990-1995 | -0.63 (-0.74,-0.52) | -0.25  (-0.29,-0.21) |
| 1995-1999 | -2.5 (-2.62,-2.38) | 1995-2000 | -2.03 (-2.19,-1.87) |
| 1999-2005 | -0.23 (-0.28,-0.17) | 2000-2008 | 0.11 (0.04,0.18) |
| 2005-2010 | 0.78 (0.7,0.85) | 2008-2014 | 0.79 (0.67,0.91) |
| 2010-2014 | 2.5 (2.37,2.63) | 2014-2021 | 0.01 (-0.06,0.08) |
| 2014-2021 | 0.01 (-0.03,0.04) | 15-19 years | 1990-1995 | -0.46 (-0.53,-0.39) | -0.12  (-0.15,-0.08) |
| 15-19 years | 1990-1995 | -1.02 (-1.09,-0.96) | -0.09  (-0.13,-0.05) | 1995-2000 | -1.36 (-1.46,-1.26) |
| 1995-1999 | -1.98 (-2.13,-1.83) | 2000-2005 | -0.33 (-0.43,-0.23) |
| 1999-2002 | -0.21 (-0.51,0.09) | 2005-2010 | 0.43 (0.32,0.53) |
| 2002-2010 | 0.43 (0.39,0.47) | 2010-2014 | 1.31 (1.15,1.47) |
| 2010-2014 | 1.93 (1.78,2.09) | 2014-2021 | -0.02 (-0.06,0.02) |
| 2014-2021 | -0.02 (-0.06,0.02) |  |  |  |  |  |

**Table S3. The APC and AAPC of prevalence for TTH among Global, China, Germany, and USA stratified by age and sex.**

| **Prevalence** | | | | | | | | | | |
| --- | --- | --- | --- | --- | --- | --- | --- | --- | --- | --- |
| **Location** | **Sex** | **Age** | **year** | **APC** | **AAPC** | **Sex** | **Age** | **year** | **APC** | **AAPC** |
| **Global** | **Female** | **10-14 years** | 1990-1994 | 0.01 (-0.03,0.06) | -0.01  (-0.03,0) | **Male** | **10-14 years** | 1990-1994 | 0.04 (0,0.07) | -0.02  (-0.03,0) |
| 1994-2000 | -0.26 (-0.3,-0.23) | 1994-2000 | -0.26 (-0.28,-0.23) |
| 2000-2005 | 0.26 (0.21,0.31) | 2000-2005 | 0.26 (0.22,0.3) |
| 2005-2010 | 0.07 (0.02,0.12) | 2005-2010 | 0.05 (0.01,0.09) |
| 2010-2017 | -0.08 (-0.11,-0.05) | 2010-2016 | -0.09 (-0.12,-0.07) |
| 2017-2021 | 0 (-0.05,0.04) | 2016-2021 | -0.01 (-0.04,0.01) |
| **15-19 years** | 1990-1996 | 0.22 (0.18,0.26) | 0.06  (0.05,0.07) | **15-19 years** | 1990-1993 | 0.44 (0.3,0.57) | 0.1  (0.06,0.13) |
| 1996-2002 | -0.24 (-0.29,-0.19) | 1993-1996 | 0.23 (-0.04,0.51) |
| 2002-2021 | 0.1 (0.1,0.11) | 1996-2001 | -0.34 (-0.43,-0.25) |
|  |  |  |  |  | 2001-2015 | 0.11 (0.1,0.12) |
|  |  |  |  |  | 2015-2021 | 0.19 (0.15,0.24) |
| **China** | **Female** | **10-14 years** | 1990-1994 | 0.01 (-0.04,0.07) | 0.1  (0.08,0.12) | **Male** | **10-14 years** | 1990-1995 | 0 (-0.05,0.05) | 0.14  (0.12,0.16) |
| 1994-2001 | -0.09 (-0.12,-0.06) | 1995-2000 | -0.23 (-0.3,-0.16) |
| 2001-2004 | 1.05 (0.87,1.23) | 2000-2005 | 0.98 (0.91,1.05) |
| 2004-2018 | 0.01 (0,0.02) | 2005-2018 | -0.02 (-0.03,0) |
| 2018-2021 | 0.17 (0.08,0.26) | 2018-2021 | 0.3 (0.19,0.41) |
| **15-19 years** | 1990-1995 | 0.02 (-0.1,0.13) | 0.3  (0.23,0.36) | **15-19 years** | 1990-1995 | -0.02 (-0.21,0.18) | 0.42  (0.34,0.5) |
| 1995-2000 | -0.32 (-0.47,-0.16) | 1995-2000 | -0.48 (-0.75,-0.2) |
| 2000-2004 | 2.16 (1.9,2.41) | 2000-2005 | 2.53 (2.25,2.81) |
| 2004-2007 | 0.25 (-0.26,0.77) | 2005-2018 | -0.06 (-0.12,-0.01) |
| 2007-2018 | -0.06 (-0.1,-0.02) | 2018-2021 | 1.24 (0.79,1.69) |
| 2018-2021 | 0.68 (0.43,0.93) |  |  |  |  |  |
| **Germany** | **Female** | **10-14 years** | 1990-1994 | -1.13 (-1.2,-1.05) | -0.01  (-0.03,0.01) | **Male** | **10-14 years** | 1990-1994 | -0.71 (-0.76,-0.67) | -0.01  (-0.03,0.01) |
| 1994-2000 | -0.59 (-0.64,-0.54) | 1994-2000 | -0.59 (-0.62,-0.56) |
| 2000-2010 | 0 (-0.02,0.01) | 2000-2008 | 0.01 (-0.01,0.02) |
| 2010-2015 | 1.61 (1.54,1.68) | 2008-2011 | 0.12 (0,0.24) |
| 2015-2021 | -0.03 (-0.07,0.01) | 2011-2019 | 0.74 (0.72,0.75) |
| **15-19 years** | 1990-1994 | -1.18 (-1.27,-1.1) | 0.02  (0,0.04) | 2019-2021 | -0.11 (-0.24,0.03) |
| 1994-1999 | -0.59 (-0.67,-0.5) | **15-19 years** | 1990-1993 | -0.93 (-1.01,-0.85) | -0.02  (-0.04,0.01) |
| 1999-2010 | -0.03 (-0.05,-0.01) | 1993-1996 | -0.69 (-0.84,-0.53) |
| 2010-2015 | 1.58 (1.5,1.66) | 1996-1999 | -1.02 (-1.17,-0.87) |
| 2015-2021 | 0.14 (0.09,0.18) | 1999-2010 | -0.04 (-0.05,-0.02) |
|  |  |  |  |  | 2010-2019 | 0.9 (0.89,0.92) |
|  |  |  |  |  | 2019-2021 | -0.14 (-0.29,0.02) |
| **USA** | **Female** | **10-14 years** | 1990-2000 | 0.01 (0,0.01) | -0.01  (-0.01,-0.01) | **Male** | **10-14 years** | 1990-2000 | 0.01 (0.01,0.02) | -0.06  (-0.06,-0.06) |
| 2000-2005 | -0.08 (-0.09,-0.08) | 2000-2005 | -0.41 (-0.43,-0.39) |
| 2005-2021 | 0 (0,0) | 2005-2021 | 0 (0,0) |
| **15-19 years** | 1990-2000 | 0.01 (0,0.01) | -0.03  (-0.04,-0.03) | **15-19 years** | 1990-2000 | 0.01 (0.01,0.02) | -0.07  (-0.08,-0.07) |
| 2000-2005 | -0.23 (-0.24,-0.22) | 2000-2005 | -0.48 (-0.5,-0.46) |
| 2005-2021 | 0 (0,0) | 2005-2021 | 0 (0,0.01) |

**Table S4. The APC and AAPC of YLDs for TTH among Global, China, Germany, and USA stratified by age and sex.**

| **YLDs** | | | | | | | | | | |
| --- | --- | --- | --- | --- | --- | --- | --- | --- | --- | --- |
| **Location** | **Sex** | **Age** | **year** | **APC** | **AAPC** | **Sex** | **Age** | **year** | **APC** | **AAPC** |
| **Global** | **Female** | **10-14 years** | 1990-1994 | 0.02 (-0.05,0.08) | 0.02  (0,0.04) | **Male** | **10-14 years** | 1990-1994 | 0.03 (-0.04,0.09) | 0.01  (0,0.03) |
| 1994-2000 | -0.2 (-0.24,-0.15) | 1994-2000 | -0.22 (-0.27,-0.18) |
| 2000-2005 | 0.23 (0.16,0.29) | 2000-2006 | 0.21 (0.16,0.25) |
| 2005-2011 | 0.09 (0.05,0.14) | 2006-2021 | 0.02 (0.02,0.03) |
| 2011-2021 | 0 (-0.02,0.02) | **15-19 years** | 1990-1993 | 0.31 (0.26,0.36) | 0.07  (0.05,0.08) |
| **15-19 years** | 1990-1996 | 0.29 (0.26,0.32) | 0.08  (0.06,0.11) | 1993-1996 | 0.17 (0.06,0.27) |
| 1996-1999 | -0.02 (-0.18,0.15) | 1996-2001 | -0.24 (-0.27,-0.21) |
| 1999-2002 | -0.23 (-0.39,-0.07) | 2001-2015 | 0.04 (0.04,0.05) |
| 2002-2006 | -0.09 (-0.17,-0.01) | 2015-2019 | 0.26 (0.21,0.32) |
| 2006-2010 | 0.18 (0.1,0.26) | 2019-2021 | 0.06 (-0.04,0.17) |
| 2010-2021 | 0.12 (0.1,0.13) |  |  |  |  |  |
| **China** | **Female** | **10-14 years** | 1990-1996 | 0.02 (-0.08,0.12) | 0.15  (0.1,0.21) | **Male** | **10-14 years** | 1990-1996 | 0 (-0.07,0.07) | 0.15  (0.1,0.2) |
| 1996-2000 | -0.23 (-0.52,0.07) | 1996-2000 | -0.28 (-0.51,-0.06) |
| 2000-2005 | 0.64 (0.46,0.82) | 2000-2005 | 1.03 (0.89,1.17) |
| 2005-2018 | 0.04 (0.01,0.07) | 2005-2011 | -0.08 (-0.18,0.01) |
| 2018-2021 | 0.62 (0.35,0.9) | 2011-2019 | 0.05 (0,0.11) |
| **15-19 years** | 1990-1995 | 0.02 (-0.06,0.09) | 0.23  (0.19,0.26) | 2019-2021 | 0.38 (-0.05,0.81) |
| 1995-2000 | -0.42 (-0.53,-0.32) | **15-19 years** | 1990-1995 | -0.05 (-0.24,0.14) | 0.23  (0.16,0.3) |
| 2000-2004 | 1.23 (1.06,1.4) | 1995-2000 | -0.41 (-0.67,-0.16) |
| 2004-2019 | 0.06 (0.04,0.07) | 2000-2005 | 1.42 (1.16,1.67) |
| 2019-2021 | 1.7 (1.35,2.06) | 2005-2018 | 0 (-0.04,0.05) |
|  |  |  |  |  | 2018-2021 | 0.79 (0.39,1.18) |
| **Germany** | **Female** | **10-14 years** | 1990-1996 | -0.83 (-1,-0.67) | 0.02  (-0.08,0.12) | **Male** | **10-14 years** | 1990-1998 | -0.58 (-0.73,-0.42) | 0.01  (-0.1,0.13) |
| 1996-2011 | 0.03 (-0.02,0.07) | 1998-2012 | 0.03 (-0.04,0.11) |
| 2011-2014 | 1.49 (0.55,2.45) | 2012-2016 | 0.9 (0.15,1.65) |
| 2014-2021 | 0.12 (-0.01,0.24) | 2016-2021 | 0.19 (-0.14,0.52) |
| **15-19 years** | 1990-1995 | -0.74 (-0.92,-0.56) | -0.01  (-0.06,0.05) | **15-19 years** | 1990-2000 | -0.69 (-0.76,-0.62) | -0.02  (-0.07,0.04) |
| 1995-2010 | 0.01 (-0.03,0.05) | 2000-2009 | 0.1 (0.01,0.19) |
| 2010-2015 | 0.84 (0.59,1.09) | 2009-2017 | 0.66 (0.55,0.77) |
| 2015-2021 | -0.14 (-0.28,0) | 2017-2021 | 0.06 (-0.21,0.34) |
| **USA** | **Female** | **10-14 years** | 1990-1998 | 0.03 (0.01,0.06) | 0.01  (0,0.02) | **Male** | **10-14 years** | 1990-2000 | 0.03 (0,0.05) | -0.04  (-0.06,-0.02) |
| 1998-2007 | -0.04 (-0.06,-0.01) | 2000-2005 | -0.38 (-0.47,-0.29) |
| 2007-2021 | 0.02 (0.01,0.03) | 2005-2021 | 0.03 (0.02,0.04) |
| **15-19 years** | 1990-1997 | 0.01 (-0.02,0.04) | -0.04  (-0.05,-0.02) | **15-19 years** | 1990-1994 | 0.11 (0.06,0.17) | -0.05  (-0.07,-0.02) |
| 1997-2006 | -0.11 (-0.14,-0.09) | 1994-2001 | -0.04 (-0.07,-0.01) |
| 2006-2011 | 0.05 (-0.02,0.13) | 2001-2004 | -0.54 (-0.71,-0.36) |
| 2011-2021 | -0.05 (-0.06,-0.03) | 2004-2019 | 0.03 (0.02,0.04) |
|  |  |  |  |  | 2019-2021 | -0.18 (-0.35,-0.01) |
